# Supplementary material
Source: publisher figshare collection journal article supplement (https://acs.figshare.com/ndownloader/files/3861796)
Supplement: Supplementary file 1 [file 3861796]

## Supporting Information:

### Isomeric Product Detection in the Heterogeneous Reaction of Hydroxyl Radicals with Aerosol Composed of Branched and Linear Unsaturated Organic Molecules

Theodora Nah<sup>1,2</sup>, Haoifei Zhang<sup>2,3</sup>, David R. Worton<sup>3,4</sup>, Christopher R. Ruehl<sup>2</sup>, Benjamin B. Kirk<sup>2</sup>, Allen H. Goldstein<sup>3,5,6</sup>, Stephen R. Leone<sup>1,2,7</sup>, and Kevin R. Wilson<sup>2,\*</sup>

<sup>1</sup>Department of Chemistry, University of California, Berkeley, CA 94720, USA

<sup>2</sup>Chemical Sciences Division, Lawrence Berkeley National Laboratory, Berkeley, CA 94720, USA

<sup>3</sup>Department of Environmental Science, Policy, and Management, University of California, Berkeley, CA 94720, USA.

<sup>4</sup>Aerosol Dynamics Inc., Berkeley, CA 94710

<sup>5</sup>Environmental and Energy Technologies Division, Lawrence Berkeley National Laboratory, Berkeley, CA 94720, USA.

<sup>6</sup>Department of Civil and Environmental Engineering, University of California, Berkeley, CA 94720, USA.

<sup>7</sup>Department of Physics, University of California, Berkeley, CA 94720, USA

\* To whom correspondence should be addressed: [krwilson@lbl.gov](mailto:krwilson@lbl.gov)

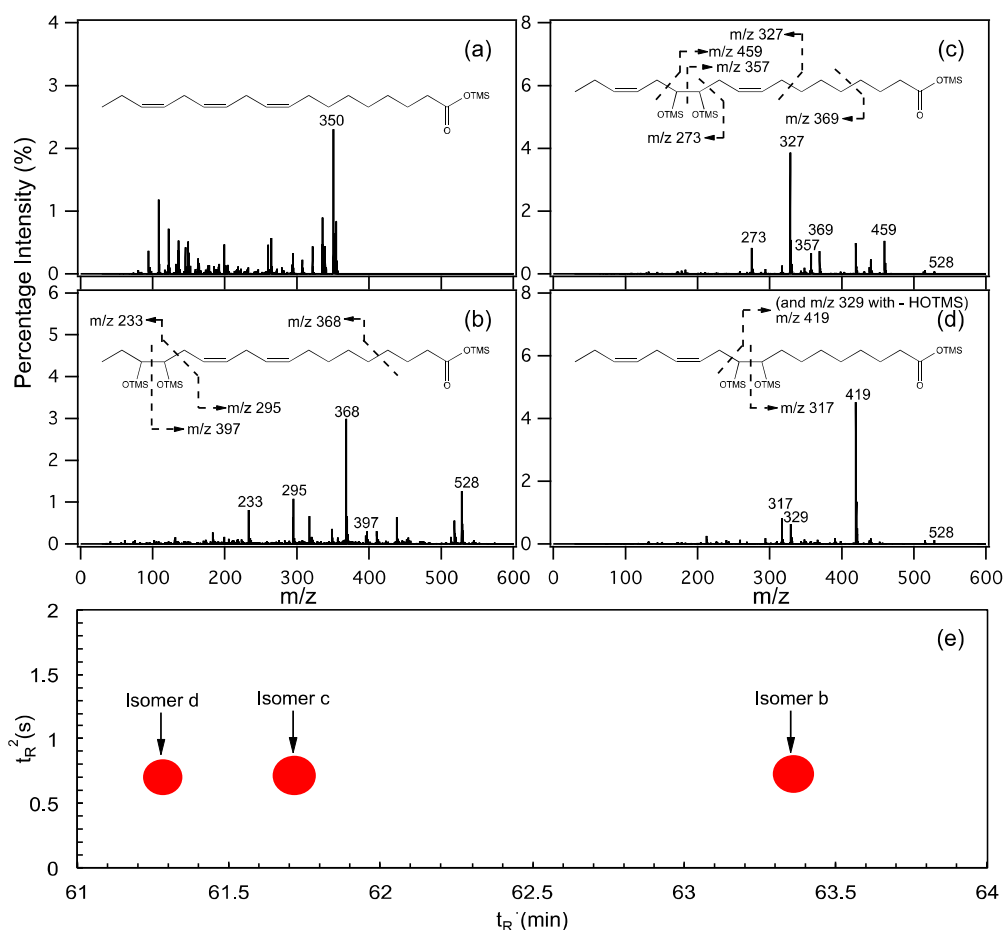

**Figure S1:** VUV mass spectra for (a) TMS-derivatized linolenic acid ( $C_{17}H_{29}CO(OTMS)$ ,  $m/z$  350), and (b – d) its TMS-derivatized diol product isomers ( $C_{17}H_{29}CO(OTMS)_3$ ,  $m/z$  528). Figure insets in panels (b – d) show the ion fragmentation patterns that explain the characteristic

ion peaks observed in the mass spectra of the derivatized diol product isomers. In panel (b), the ion peak at  $m/z$  368 is formed by fragmentation and H rearrangement. (e) The relative abundance of  $C_{17}H_{29}CO(OTMS)_3$  diol isomers formed during reaction at 10 %  $[O_2]$  shown in GC $\times$ GC space ( $t_R^1$  vs.  $t_R^2$ ). Each circle represents a single isomer and its relative abundance is represented by the size of the circle. Isomer b has OTMS groups on C15 and C16 of the linolenic acid backbone (mass spectrum in panel b). Isomer c has OTMS groups on C12 and C13 of the linolenic acid backbone (mass spectrum in panel c). Isomer d has OTMS groups on C9 and C10 of the linolenic acid backbone (mass spectrum in panel d).

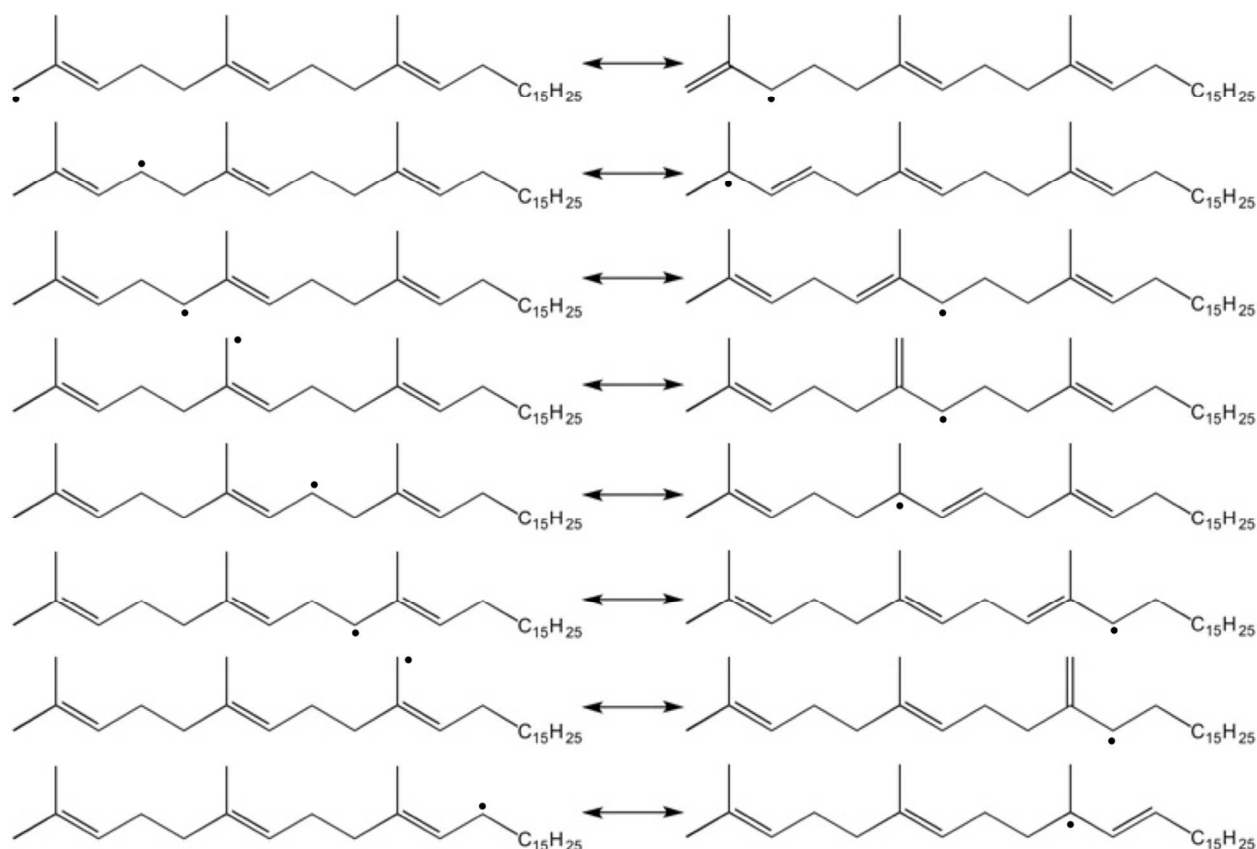

**Figure S2:** Structures of all 16 possible resonance-stabilized allylic R radicals formed from H atom abstraction reactions during squalene oxidation.

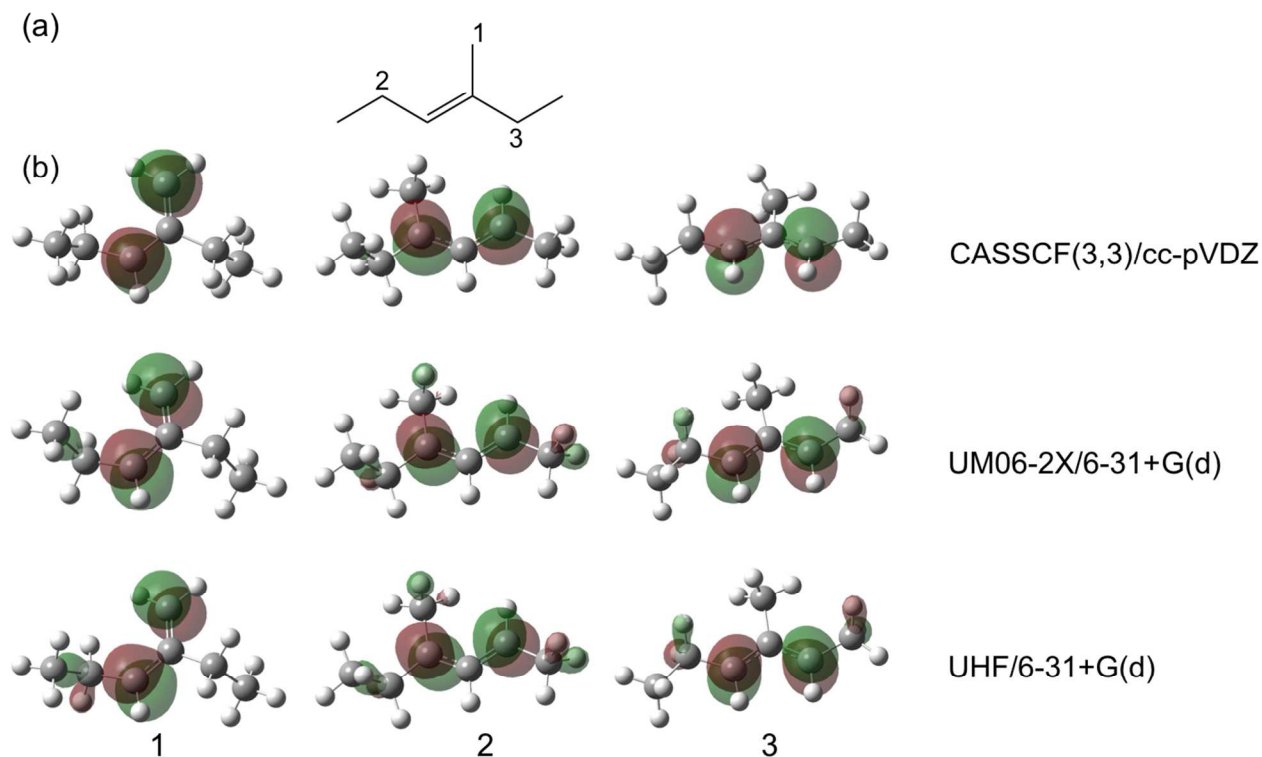

**Figure S3:** (a) The alkene used in spin density calculations. The carbon sites at which H atoms are abstracted from to form the allylic alkyl radicals are indicated. (b) Singly occupied molecular orbitals of the allylic alkyl radicals formed from H atom abstraction reactions computed using the Gaussian 09 program at three levels of theory (from top to bottom): the complete active space self-consistent field method CASSCF(3,3)/cc-pVDZ using an active-space of three electrons in the three  $\pi$ -valence orbitals; the hybrid density functional method UM06-2X/6-31+G(d); and the unrestricted hartree fock method UHF/6-31+G(d). In each case, a geometry optimization is undertaken and confirmed to be a minimum by a frequency calculation that resulted in no imaginary frequencies. The singly occupied molecular orbitals are drawn using the GaussView software package.

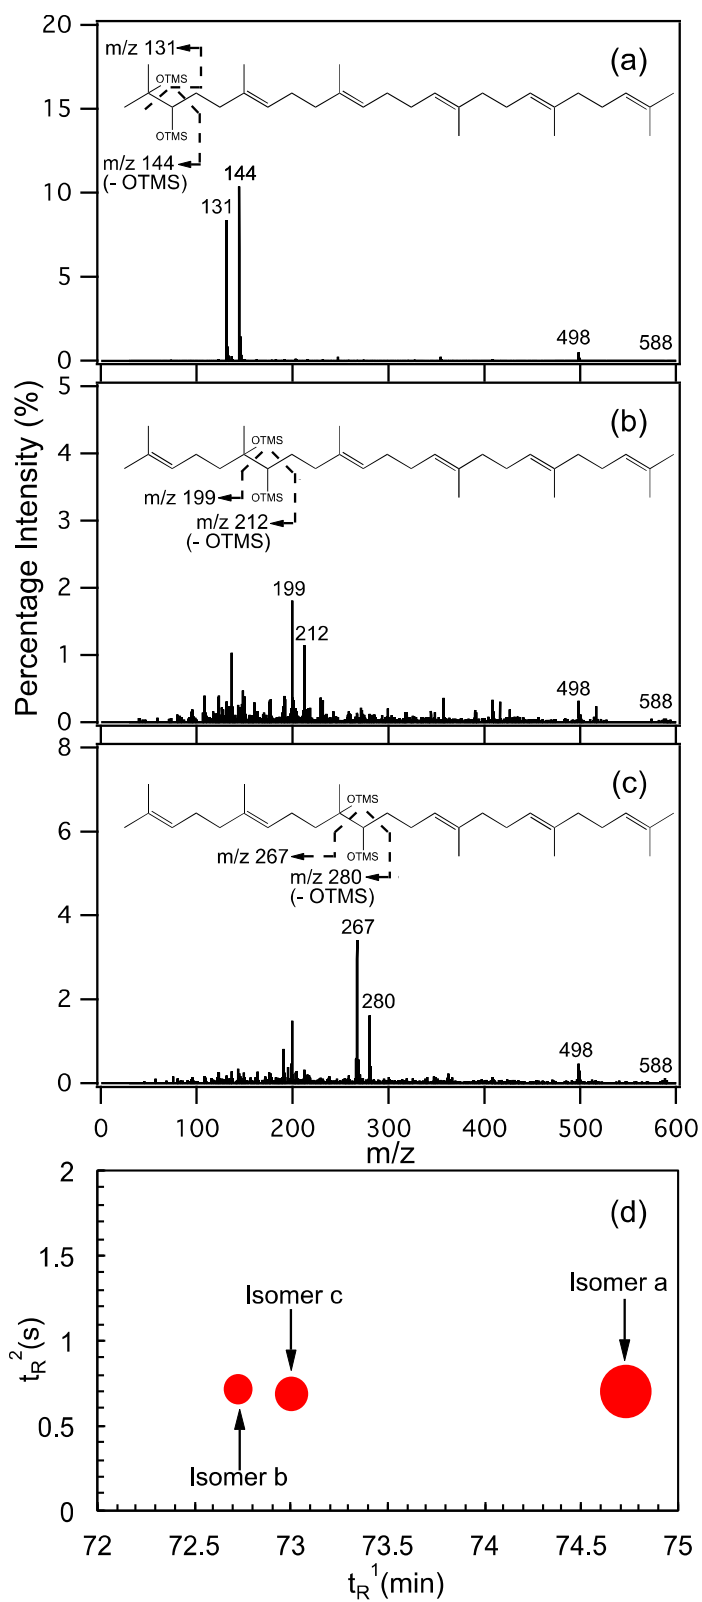

**Figure S4:** VUV mass spectra of the TMS-derivatized  $C_{30}H_{50}(OTMS)_2$  diol product isomers ( $m/z$  588). Figure insets in panels (a – c) show the ion fragmentation patterns that explain the

characteristic ion peaks observed in the mass spectra. In panels (a – c), the  $m/z$  498 fragment ion is formed from the loss of HOTMS. (d) The relative abundance of  $C_{30}H_{50}(OTMS)_2$  diol isomers formed during reaction at  $\sim 1\%$   $[O_2]$  shown in GC $\times$ GC space ( $t_R^1$  vs.  $t_R^2$ ). Each circle represents a single isomer and its relative abundance is represented by the size of the circle. Isomer a has OTMS groups on C2 and C3 of the squalene backbone (mass spectrum in panel a). Isomer b has OTMS groups on C6 and C7 of the squalene backbone (mass spectrum in panel b). Isomer c has OTMS groups on C10 and C11 of the squalene backbone (mass spectrum in panel c).

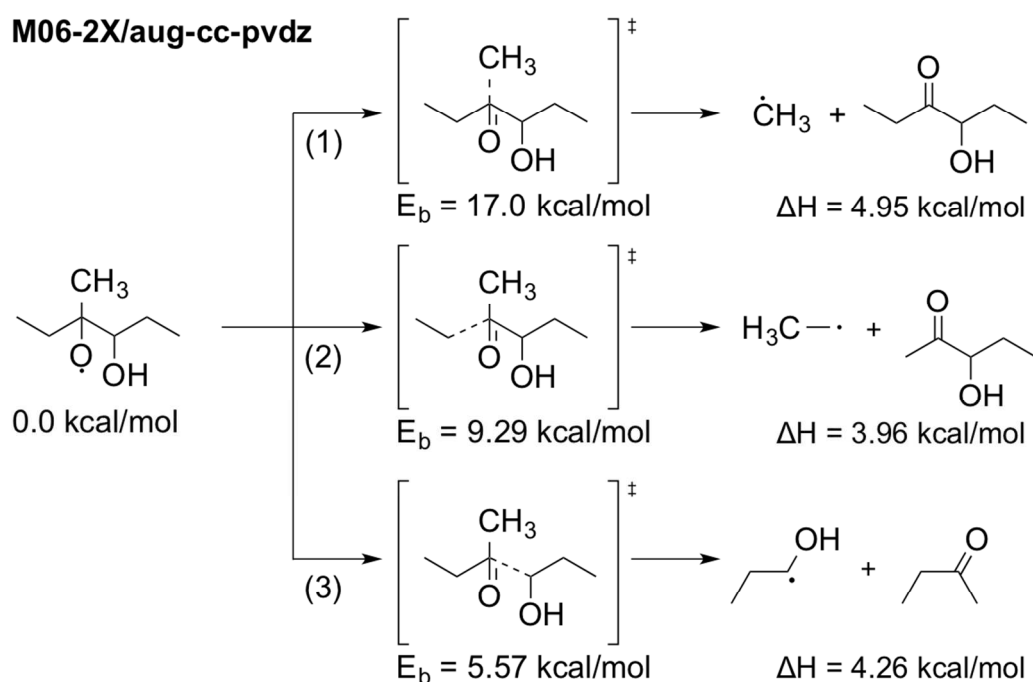

**Figure S5:** Barrier heights ( $E_b$ ) and enthalpies ( $\Delta H$ ) of the three possible fragmentation reaction pathways undertaken by a tertiary hydroxyalkoxy radical. These are calculated using the Gaussian 09 program at the M06-2X level with the aug-cc-pvdz basis set.

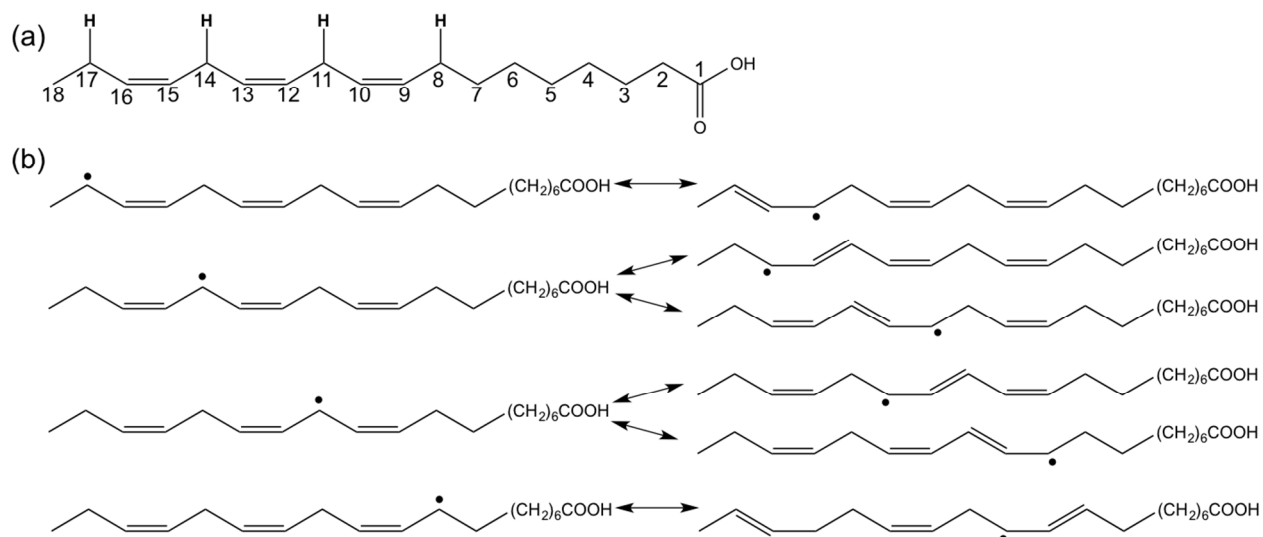

**Figure S6:** (a) Allylic H atoms (bold) present in linolenic acid (located at C8, C11, C14 and C17 of the carbon backbone). (b) Structures of all 10 possible resonance-stabilized allylic R radicals formed from H atom abstraction reactions during linolenic acid oxidation.

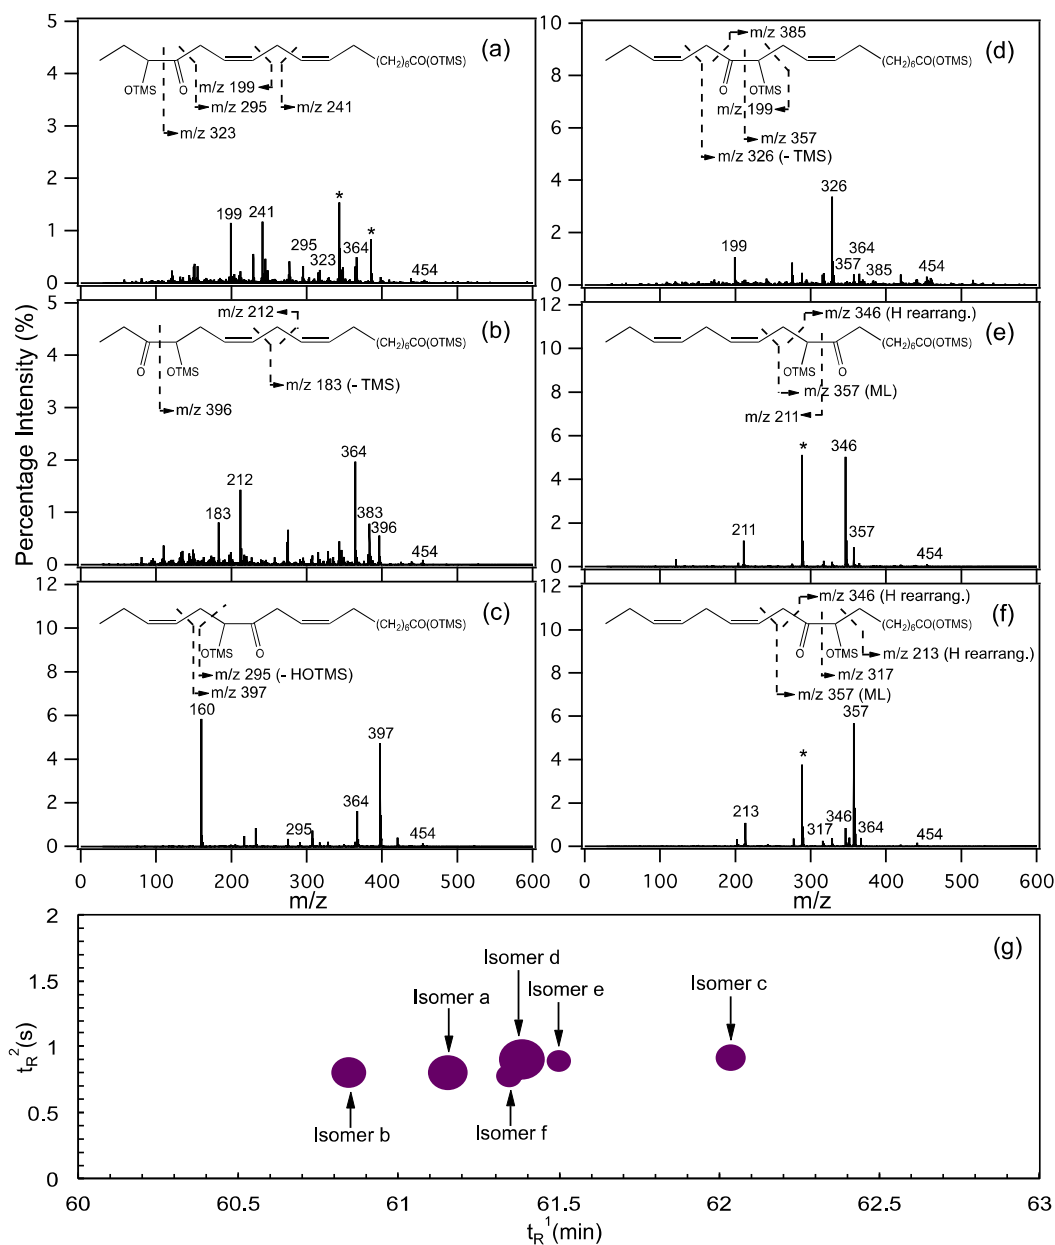

**Figure S7:** VUV mass spectra for the TMS-derivatized  $C_{17}H_{28}CO_2(OTMS)_2$  hydroxycarbonyl product isomers ( $m/z$  454). Figure insets in panels (a – f) show the ion fragmentation patterns that explain the characteristic ion peaks observed in the mass spectra. The McLafferty rearrangement and H rearrangement are labeled as “ML” and “H rearrang.” respectively. Prominent fragment ion peaks that could not be identified are indicated by \*. In panels (a – f), the  $m/z$  364 fragment ion is formed from the loss of HOTMS. In panel (b), the  $m/z$  383 fragment ion peak is formed from the loss of  $C_6H_{13}O_2Si$ . In panel (c), the  $m/z$  160 fragment ion is formed from the cleavage of the C4-C5 bond in the carbon backbone. (g) The relative abundance of

$C_{17}H_{28}CO_2(OTMS)_2$  hydroxycarbonyl isomers formed during reaction at 10 %  $[O_2]$  shown in GC×GC space ( $t_R^1$  vs.  $t_R^2$ ). Each circle represents a single isomer (whose mass spectrum is shown in panels a – f accordingly) and its relative abundance is represented by the size of the circle.
